# Supplementary material
Source: Elsevier journal article supplement (https://repository.kaust.edu.sa/bitstream/handle/10754/627744/mmc2.docx?isAllowed=n)
Supplement: mmc2 [file mmc2.docx]

**Supplementary Table S1**

Correlation coefficients for the relationships between the abundances of total PPEs and chlorophyll *a* concentrations. Monthly datasets at 1 m (KSt. 1, KSt. 2 and KSt. 3) and 8 (KSt. 1) or 10 m depths (KSt. 2 and KSt. 3) from the three sampling stations, KSt. 1 (innermost area), KSt. 2 (middle area) and KSt. 3 (bay entrance area) in the Ofunato Bay in 2015 were used for this analysis.

| Parameter | Station | Depth | PPEs abundance | | |
| --- | --- | --- | --- | --- | --- |
| r value | *p* value | Significance level |
| Chlorophyll *a* | KSt. 1 | 1m | -0.661 | 0.019 | * |
| 8m | -0.536 | 0.071 | NS |
| KSt. 2 | 1m | -0.531 | 0.075 | NS |
| 10m | -0.388 | 0.211 | NS |
| KSt. 3 | 1m | -0.583 | 0.043 | * |
| 10m | -0.428 | 0.164 | NS |

NS: Not significant, **P*<0.05

**Supplementary Table S2**

Correlation coefficients for the relationships between the abundances of individual genera of PPEs (*B*, *Bathycoccus*; *O*, *Ostreococcus*; and *M*, *Micromonas*) and chlorophyll *a* concentrations. Monthly datasets at 1 m (KSt. 1, KSt. 2 and KSt. 3) and 8 (KSt. 1) or 10 m depths (KSt. 2 and KSt. 3) from the three sampling stations, KSt. 1 (innermost area), KSt. 2 (middle area) and KSt. 3 (bay entrance area) in the Ofunato Bay in 2015 were used for this analysis.

| Station with depth | PPEs | Chlorophyll *a* | | |
| --- | --- | --- | --- | --- |
| r value | *p* value | significance level |
| KSt. 1-1 m | *B* | -0.738 | 0.006 | ** |
| *M* | -0.468 | 0.124 | NS |
| *O* | -0.150 | 0.639 | NS |
| KSt. 1-8 m | *B* | -0.349 | 0.265 | NS |
| *O* | -0.450 | 0.136 | NS |
| *M* | -0.531 | 0.075 | NS |
| KSt. 2-1 m | *B* | -0.551 | 0.063 | NS |
| *M* | -0.387 | 0.213 | NS |
| *O* | -0.155 | 0.630 | NS |
| KSt. 2-10 m | *B* | -0.092 | 0.774 | NS |
| *M* | -0.303 | 0.337 | NS |
| *O* | 0.545 | 0.066 | NS |
| KSt. 3-1 m | *B* | -0.640 | 0.024 | * |
| *M* | -0.387 | 0.215 | NS |
| *O* | -0.271 | 0.393 | NS |
| KSt. 3-10 m | *B* | -0.346 | 0.296 | NS |
| *M* | -0.311 | 0.323 | NS |
| *O* | -0.307 | 0.331 | NS |

NS: Not significant, **P*<0.05, ***P*<0.01
